# Supplementary material
Source: PubMed Central journal article supplement (PMC3632949)
Supplement: AAC.00175-13_zac999101810so1.pdf [file AAC.00175-13_zac999101810so1.pdf]

SUPPLEMENTAL FIGURES AND TABLES

**Targeting *Mycobacterium tuberculosis* and other microbial pathogens  
using improved synthetic antibacterial peptides**

Ramón-García, S., *et al.*

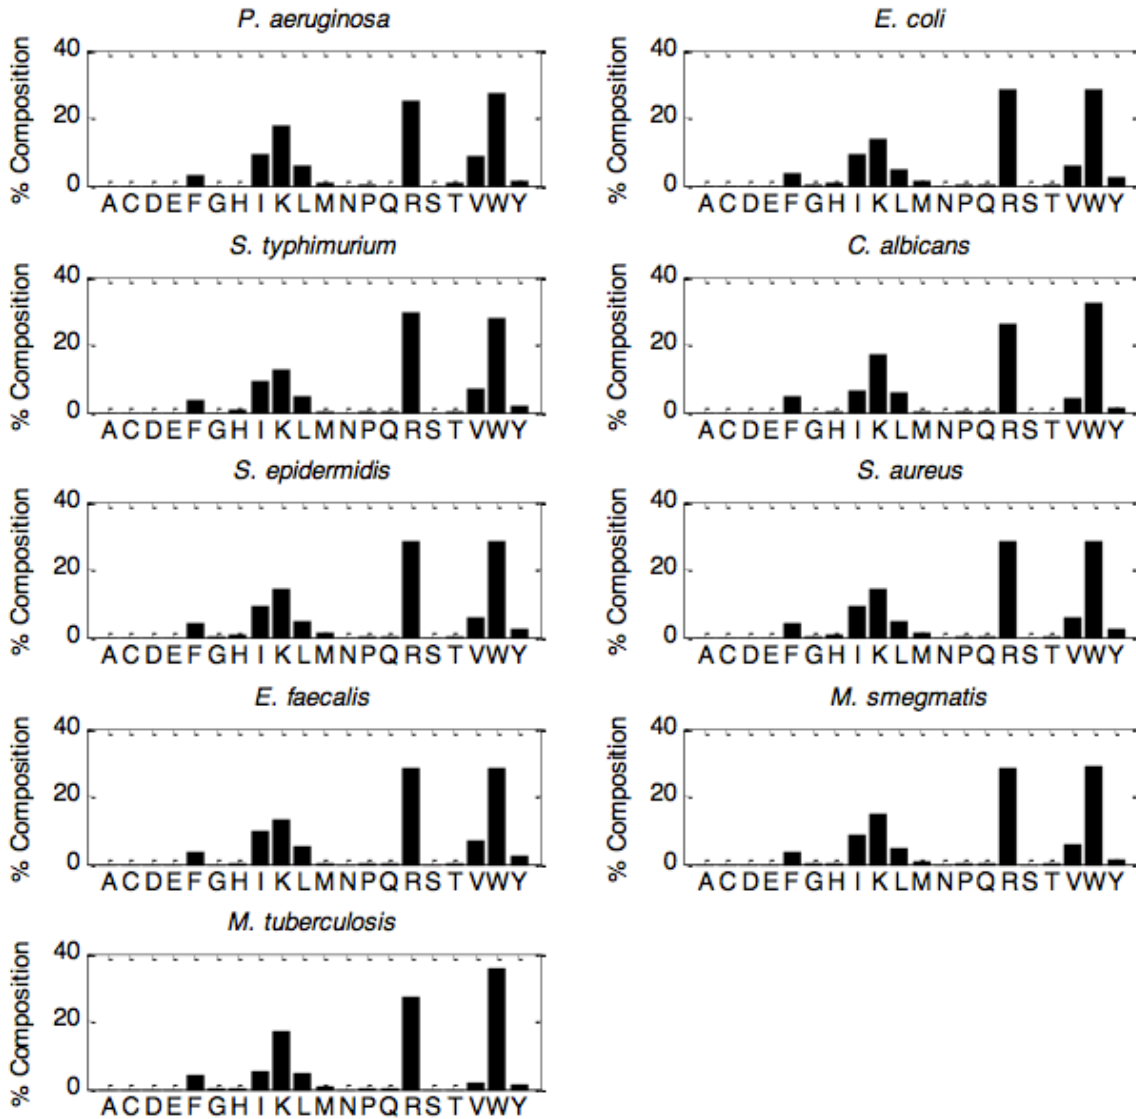

**Supplemental Figure 1. Activities of peptides in PL-D as a function of their amino acid compositions.** Amino acid compositions of positive peptides for all microbes tested. For further information see Supplemental Table 1.

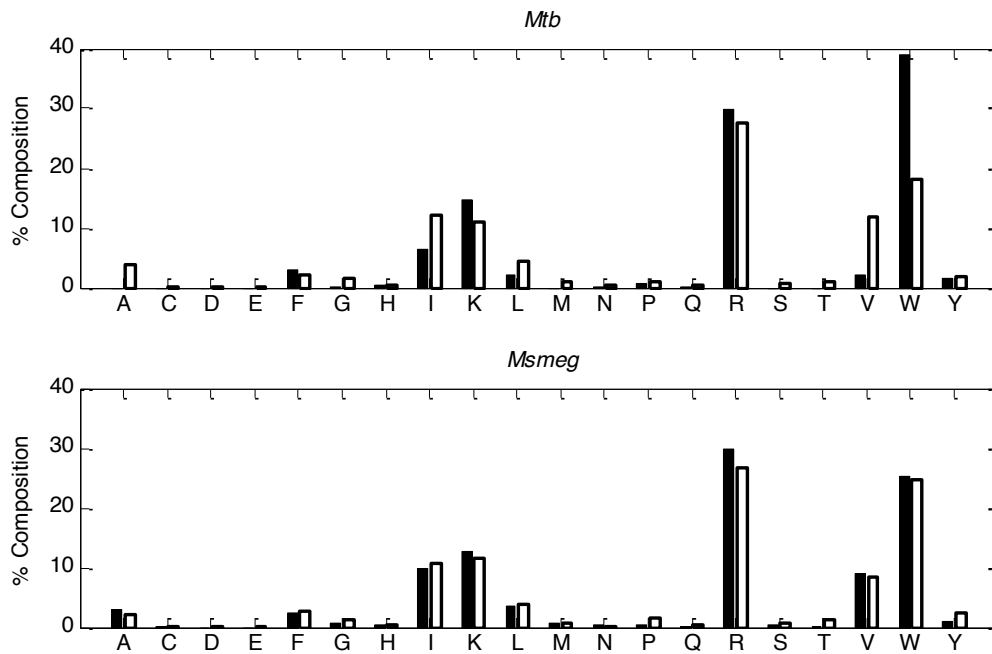

10

11 **Supplemental Figure 2. Activities against *Mtb* and *Msmeg* of peptides in PL-A as a**  
 12 **function of their amino acid compositions.** Amino acid compositions are shown for the  
 13 activity classes "positive" (black bars) and "negative" (white bars). The two *Mtb* groups had  
 14 statistically different A, I, L, V and W compositions while *Msmeg* groups had no significant  
 15 variations for any amino acid (see Supplemental Table 1).

16

17

18 **Supplemental Table 1.** Distribution of activity classes in PL-D for the different bacterial

19 species

---

|                        | Number of peptides<br>for "Positive" | Number of peptides<br>for "Negative" |
|------------------------|--------------------------------------|--------------------------------------|
|                        | (MIC < 10 $\mu$ M)                   | (MIC >20 $\mu$ M)                    |
| <i>P. aeruginosa</i>   | 19                                   | 16                                   |
| <i>S. typhimurium</i>  | 41                                   | 4                                    |
| <i>E. coli</i>         | 47                                   | 2                                    |
| <i>E. faecalis</i>     | 34                                   | 2                                    |
| <i>S. epidermidis</i>  | 48                                   | 1                                    |
| <i>S. aureus</i>       | 48                                   | 1                                    |
| <i>C. albicans</i>     | 26                                   | 8                                    |
| <i>M. tuberculosis</i> | 26                                   | 15                                   |
| <i>M. smegmatis</i>    | 44                                   | 1                                    |

---

20

**Supplemental Table 2.** Cytotoxic activities of peptides in PL-D library against mammalian cells (THP1) and activity ratios compared to *Mtb*.

| Sequence <sup>a</sup> | <i>M. tuberculosis</i>          |                                 | THP1 toxicity                  |                                | Selectivity index (SI)<br>THP1 / <i>Mtb</i> |                  |
|-----------------------|---------------------------------|---------------------------------|--------------------------------|--------------------------------|---------------------------------------------|------------------|
|                       | MIC <sub>50</sub><br>( $\mu$ M) | MIC <sub>90</sub><br>( $\mu$ M) | IC <sub>50</sub><br>( $\mu$ M) | IC <sub>90</sub><br>( $\mu$ M) | SI <sub>50</sub>                            | SI <sub>90</sub> |
| <b>WKWLKKWIK</b>      | 0.8                             | 1.1                             | 24.3                           | 24.3                           | 32.0                                        | 21.3             |
| ILRWKWRWRR            | 1.2                             | 2.4                             | 25.2                           | 50.4                           | 21.3                                        | 21.3             |
| ILPWKWRWRR            | 1.3                             | 2.6                             | 56.4                           | 56.4                           | 42.7                                        | 21.3             |
| RWRRKWWWW             | 0.9                             | 2.9                             | 73.0                           | 145.9                          | 85.3                                        | 51.2             |
| <b>WRKFWKYLK</b>      | 0.6                             | 3.0                             | 47.3                           | 47.3                           | 85.3                                        | 16.0             |
| KRWWKWR               | 0.9                             | 3.1                             | 79.2                           | 158.4                          | 85.3                                        | 51.2             |
| RRWKWWR               | 0.9                             | 3.6                             | 152.6                          | 152.6                          | 170.7                                       | 42.7             |
| KIWWWRKR              | 1.0                             | 4.1                             | 173.9                          | 173.9                          | 170.7                                       | 42.7             |
| <b>RLWWWRK</b>        | 2.0                             | 4.1                             | 87.0                           | 173.9                          | 42.7                                        | 42.7             |
| <b>KWKWWRKI</b>       | 2.1                             | 4.2                             | 90.4                           | 90.4                           | 42.7                                        | 21.3             |
| <b>RIRRWKFRW</b>      | 2.1                             | 4.3                             | 182.5                          | 182.5                          | 85.3                                        | 42.7             |
| <b>RLKRWWKFL</b>      | 1.5                             | 4.5                             | 96.1                           | 48.0                           | 64.0                                        | 10.7             |
| RWRWRKWW              | 1.7                             | 4.6                             | 147.5                          | 147.5                          | 85.3                                        | 32.0             |
| KRWWWRFR              | 2.0                             | 5.2                             | 83.4                           | 166.7                          | 42.7                                        | 32.0             |
| KRWRKWR               | 2.0                             | 5.3                             | 84.4                           | 84.4                           | 42.7                                        | 16.0             |
| <b>RRWRWVVW</b>       | 1.0                             | 5.6                             | 179.1                          | 179.1                          | 170.7                                       | 32.0             |
| <b>WFKMRWGR</b>       | 0.7                             | 5.9                             | 189.3                          | 189.3                          | 256.0                                       | 32.0             |
| <b>KFKWRMLI</b>       | 2.3                             | 6.1                             | 49.0                           | 49.0                           | 21.3                                        | 8.0              |
| FIKWKFRWWRK           | 2.8                             | 7.4                             | 14.8                           | 59.1                           | 5.3                                         | 8.0              |
| RIKRWWR               | 1.3                             | 7.8                             | 167.2                          | 167.2                          | 128.0                                       | 21.3             |
| <b>RWRWWRVY</b>       | 4.0                             | 8.0                             | 171.5                          | 171.5                          | 42.7                                        | 21.3             |
| HQFRFRVRRK            | 3.1                             | 8.2                             | 65.8                           | 131.7                          | 21.3                                        | 16.0             |
| <b>LKRRWKWI</b>       | 3.6                             | 8.8                             | 186.7                          | 186.7                          | 51.2                                        | 21.3             |
| <b>RRRIKIRWY</b>      | 2.2                             | 8.9                             | 190.2                          | 190.2                          | 85.3                                        | 21.3             |
| <b>RLWVKIWLK</b>      | 1.1                             | 9.0                             | 192.8                          | 192.8                          | 170.7                                       | 21.3             |
| <b>KRRWRIWL</b>       | 1.5                             | 9.1                             | 195.1                          | 195.1                          | 128.0                                       | 21.3             |
| <b>FFIYVRRR</b>       | 1.1                             | 11.9                            | 190.8                          | 190.8                          | 170.7                                       | 16.0             |
| <b>IRMIRVLL</b>       | 1.1                             | 13.7                            | 219.0                          | 219.0                          | 204.8                                       | 16.0             |
| <b>RWRKIWKW</b>       | 2.1                             | 16.6                            | 177.3                          | 177.3                          | 85.3                                        | 10.7             |
| LRFILWKR              | 0.7                             | 17.0                            | 181.0                          | 181.0                          | 256.0                                       | 10.7             |
| <b>RWIRIRWH</b>       | 1.4                             | 17.0                            | 181.8                          | 181.8                          | 128.0                                       | 10.7             |
| <b>RRRWKLM</b>        | 3.7                             | 17.6                            | 47.0                           | 94.0                           | 12.8                                        | 5.3              |
| <b>LRRWIRIRW</b>      | 0.7                             | 17.7                            | 94.5                           | 189.1                          | 128.0                                       | 10.7             |
| <b>RKFRWVIR</b>       | 2.2                             | 17.8                            | 190.2                          | 190.2                          | 85.3                                        | 10.7             |
| <b>WKIVFWRR</b>       | 7.3                             | 23.3                            | 186.0                          | 186.0                          | 25.6                                        | 8.0              |
| <b>RQRRVVIWW</b>      | 2.3                             | 24.7                            | 197.2                          | 197.2                          | 85.3                                        | 8.0              |
| <b>RRRVIVKW</b>       | 1.5                             | 24.7                            | 98.6                           | 197.2                          | 64.0                                        | 8.0              |
| RRWKIVVIRWR           | 2.6                             | 24.8                            | 33.1                           | 132.3                          | 12.8                                        | 5.3              |
| RLWRIVVIRVKR          | 2.7                             | 25.9                            | 69.2                           | 138.4                          | 25.6                                        | 5.3              |
| RLRRIVVIRVFR          | 7.4                             | 29.8                            | 158.8                          | 158.8                          | 21.3                                        | 5.3              |
| VRLRIRVRVIRK          | 7.5                             | 30.1                            | 20.1                           | 40.2                           | 2.7                                         | 1.3              |
| RRYHWRIYI             | 1.0                             | 33.2                            | 176.9                          | 176.9                          | 170.7                                       | 5.3              |

|                  |      |       |       |       |      |     |
|------------------|------|-------|-------|-------|------|-----|
| <b>RKWKIKWYW</b> | 2.2  | 34.5  | 91.9  | 183.8 | 42.7 | 5.3 |
| <b>YRLRVKWKW</b> | 3.7  | 36.0  | 191.9 | 191.9 | 51.2 | 5.3 |
| <b>WKWRVVRTI</b> | 19.3 | 51.5  | 206.0 | 206.0 | 10.7 | 4.0 |
| <b>RTKKWIVWI</b> | 4.1  | 78.1  | 208.3 | 208.3 | 51.2 | 2.7 |
| NWRKLYRRK        | 10.9 | 109.3 | 174.9 | 174.9 | 16.0 | 1.6 |
| YKFRWRIYI        | 16.2 | 130.0 | 173.3 | 173.3 | 10.7 | 1.3 |
| <b>KRKKRFKWW</b> | 8.8  | 141.0 | 188.0 | 188.0 | 21.3 | 1.3 |

<sup>a</sup>Peptides originating from PL-C are shown in bold
